# Supplementary material for: Appropriate excitation wavelength removes obfuscations from pyrene excimer kinetics and mechanism studies
Source: Royal Society of Chemistry journal article supplement (doi:10.1039/c2pp25307k), 2013-01-07
Supplement: c2pp25307k.pdf [file c2pp25307k.pdf]

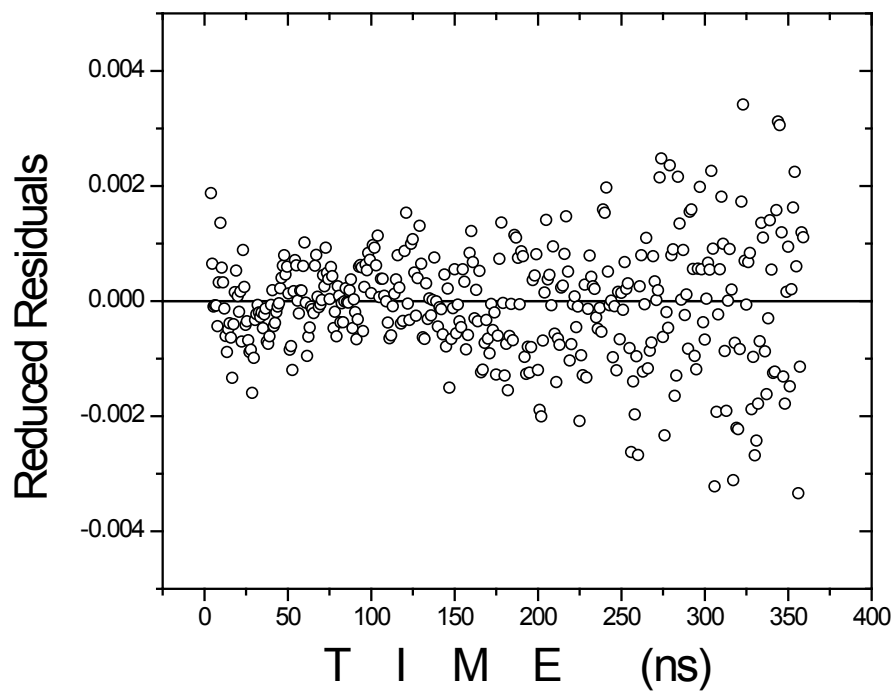

**Figure 1.** Reduced residuals of single exponential fit of 366 nm decay in Figure 4 of the manuscript

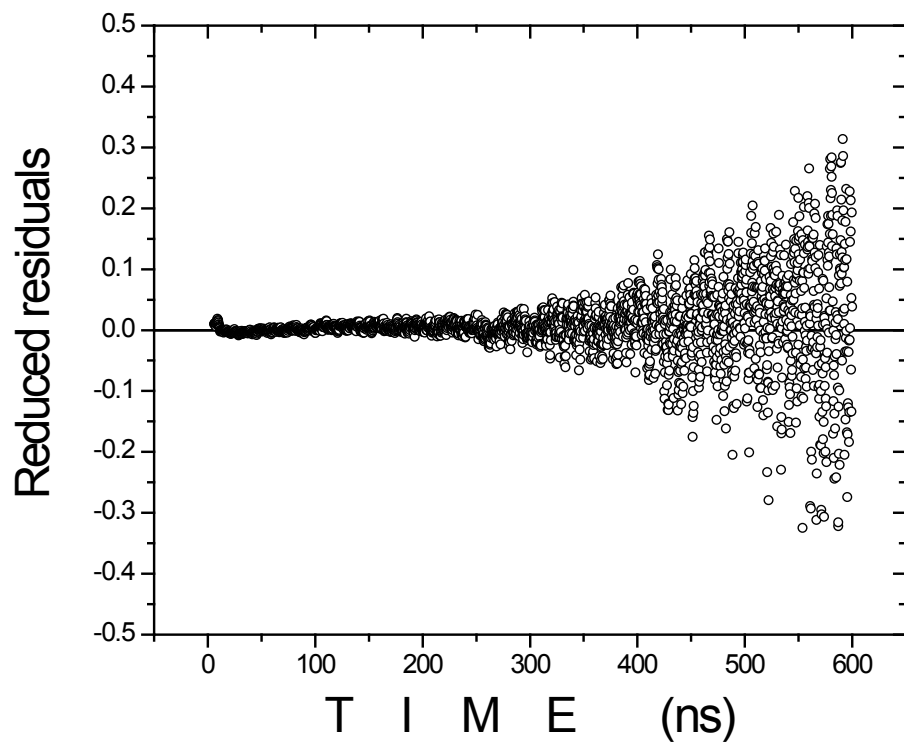

**Figure 2.** Reduced residuals of single exponential fit of 366 nm decay in Figure 5 of the manuscript
